# Supplementary material for: Fabrication of high-performance CeO2–MnOx/TiO2/Ti monolithic catalysts for low-temperature and stable CO oxidation
Source: Royal Society of Chemistry journal article supplement (doi:10.1039/d3cy00233k), 2023-01-01
Supplement: d3cy00233k1.pdf [file d3cy00233k1.pdf]

# **Fabrication of High-performance CeO<sub>2</sub>-MnO<sub>x</sub>/TiO<sub>2</sub>/Ti Monolithic Catalysts for Low-temperature and Stable CO Oxidation**

Junchao Wang,<sup>‡a,b</sup> Xinyue Tang,<sup>‡d</sup> Jing Li,<sup>c</sup> Shizhi Dong,<sup>e</sup> Xinglai Zhang,<sup>b</sup> and  
Baodan Liu<sup>\*c</sup>

<sup>a</sup> School of Materials Science and Engineering, University of Science and  
Technology of China, No. 72 Wenhua Road, Shenyang 110016 China

<sup>b</sup> Shenyang National Laboratory for Materials Science (SYNL), Institute of Metal  
Research (IMR), Chinese Academy of Sciences (CAS), No. 72 Wenhua Road,  
Shenyang 110016 China

<sup>c</sup> Foshan Graduate School of Innovation, Northeastern University, No. 2, Zhihui  
Road, Shunde District, Foshan, 528300, China

<sup>d</sup> School of Materials Science and Engineering, Shenyang Ligong University,  
Shenyang 110159, China

<sup>e</sup> School of Material Science and Engineering, Liaoning Technical University, No.  
47, Zhonghua Road, Fuxin, 123000 China

## **Corresponding Author**

[baodanliu@hotmail.com](mailto:baodanliu@hotmail.com);

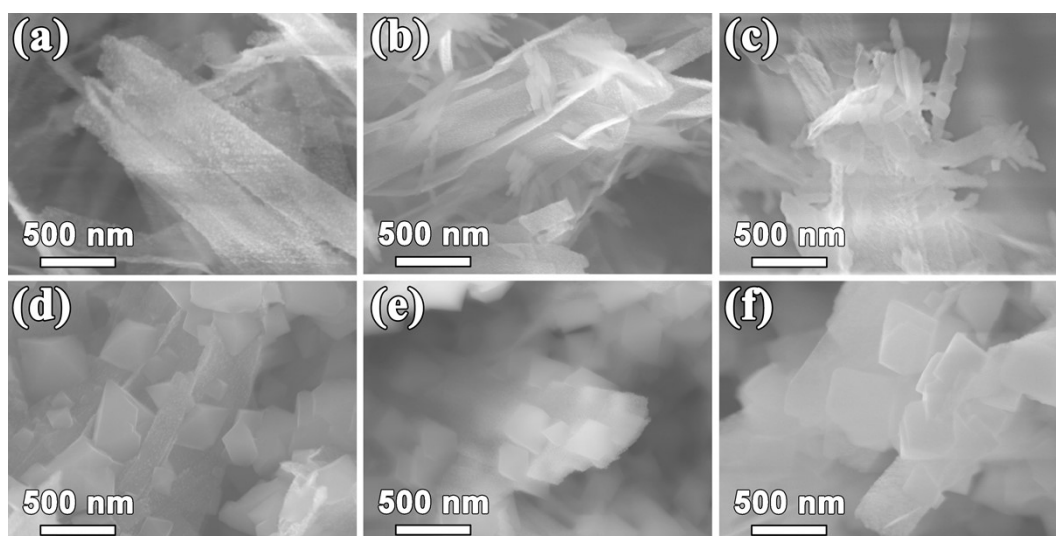

**Figure S1.** SEM images of the  $\text{CeO}_2\text{-MnO}_x/\text{TiO}_2/\text{Ti}$  catalysts prepared at different deposition time: (a) 3 h; (b) 6 h; (c) 9 h; (d) 12 h; (e) 18 h; (f) 24 h.

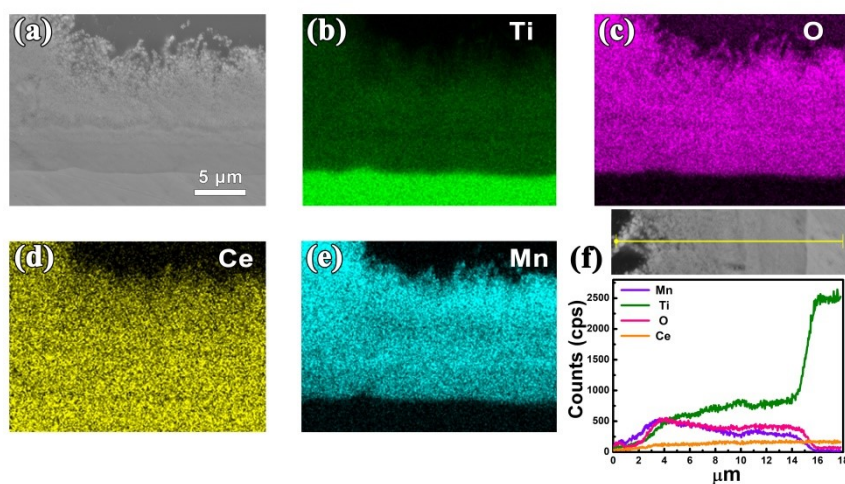

**Figure S2.** (a) SEM images of cross-section of  $\text{CeMn}/\text{TiO}_2(200)$  catalyst and corresponding EDS mapping results: (b-e) Ti, O, Ce and Mn, respectively; (f) elemental line scan profiles along the yellow line direction.

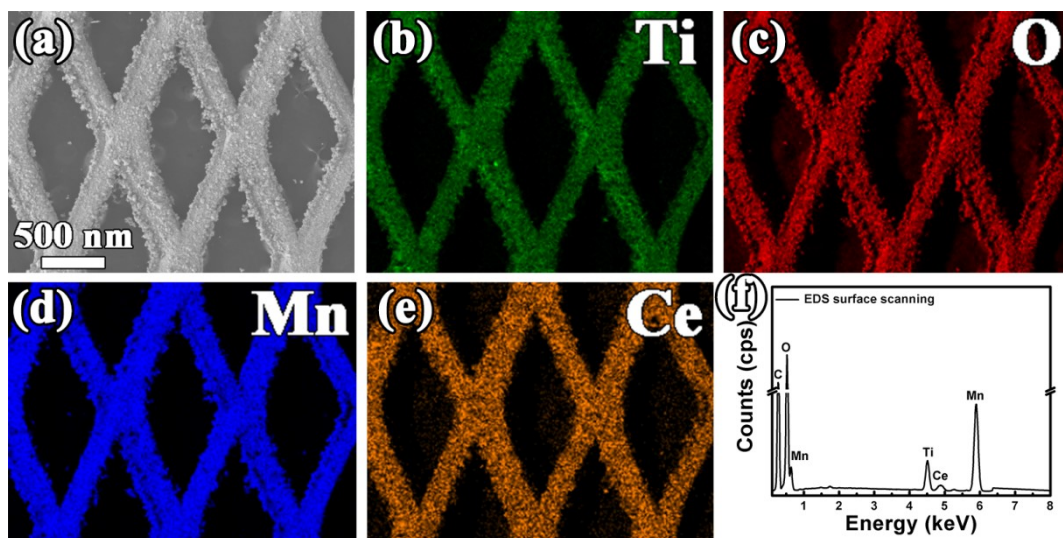

**Figure S3.** (a) SEM images of CeMn/TiO<sub>2</sub>(200) catalysts on Ti mesh and corresponding EDS mapping results: (b) Ti; (c) O; (d) Mn; (e) Ce; (f) EDS spectrum.

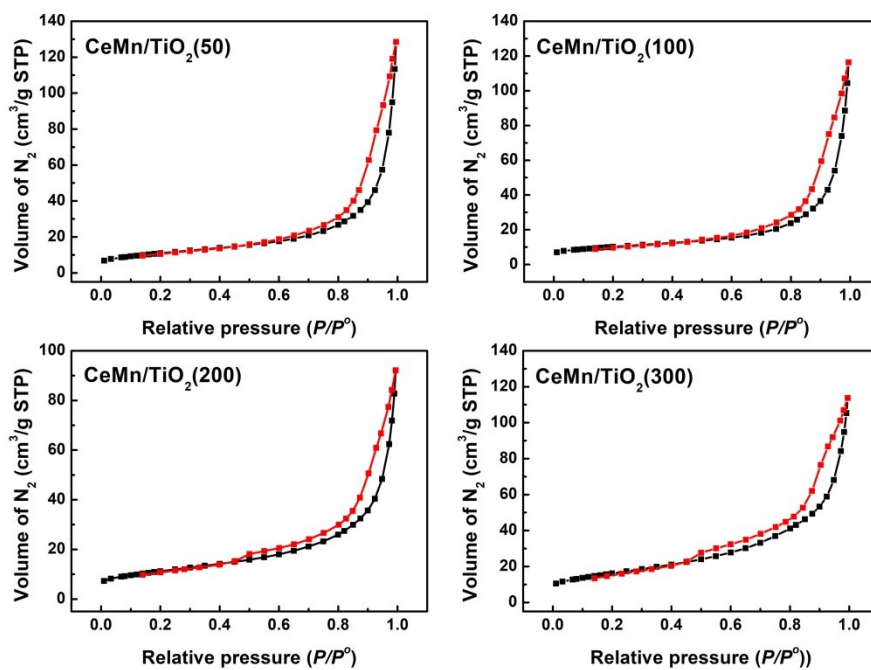

**Figure S4.** N<sub>2</sub> adsorption-desorption isotherms curves of CeO<sub>2</sub>-MnO<sub>x</sub>/TiO<sub>2</sub>/Ti monolithic catalysts with different urea concentrations.

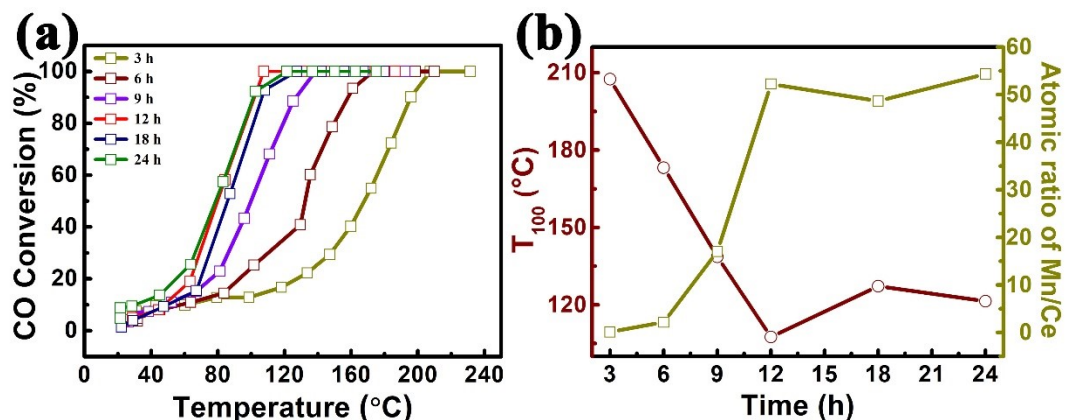

**Figure S5.** (a) Catalytic CO oxidation light-off curves of as-prepared CeO<sub>2</sub>-MnO<sub>x</sub>/TiO<sub>2</sub>/Ti catalysts obtained by different deposition time; (b) Relationship of T<sub>100</sub> and the atomic ratio of Mn/Ce as a dependence with deposition time.

**Table S1.** Comparison of the activity for CO oxidation on different CeO<sub>2</sub> catalysts in literatures.

| Catalyst                               | Reaction temperature      | Reaction condition                                            | Reference |
|----------------------------------------|---------------------------|---------------------------------------------------------------|-----------|
| CeO <sub>2</sub> /TiO <sub>2</sub> /Ti | T <sub>50</sub> = 350 °C  | $p(\text{CO}) = 0.998\%$ , $p(\text{O}_2) = 20.04\%$ , in He. | [1]       |
| CeO <sub>2</sub> microspheres          | T <sub>90</sub> = 338 °C  | 1 vol.% CO, 4 vol.% O <sub>2</sub> , balanced He.             | [2]       |
| CeO <sub>2</sub>                       | T <sub>98</sub> = 370 °C  | 1 vol.% CO, 20 vol.% O <sub>2</sub> , 79 vol.% Ar.            | [3]       |
| CeO <sub>2</sub> NR <sub>s</sub>       | T <sub>100</sub> > 390 °C | 1 vol.% CO, 20 vol.% O <sub>2</sub> , 79 vol.% Ar.            | [4]       |
| Ce/TiO <sub>2</sub>                    | T <sub>100</sub> = 334 °C | $p(\text{CO}) = 0.998\%$ , $p(\text{O}_2) = 20.04\%$ , in He. | This work |

**Table S2.** Mass loss of a series of CeO<sub>2</sub>-MnO<sub>x</sub>/TiO<sub>2</sub>/Ti catalysts after ultrasonic treatment for 10 min (wt%).

| Catalyst                    | Initial mass<br>(mg) | Final mass<br>(mg) | Loss mass<br>(mg) | Mass loss<br>ratio |
|-----------------------------|----------------------|--------------------|-------------------|--------------------|
| CeMn/TiO <sub>2</sub> (50)  | 411.8                | 405                | 6.8               | 1.65 wt%           |
| CeMn/TiO <sub>2</sub> (100) | 434                  | 427                | 7                 | 1.61 wt%           |
| CeMn/TiO <sub>2</sub> (200) | 383.4                | 377.1              | 6.3               | 1.64 wt%           |
| CeMn/TiO <sub>2</sub> (300) | 453.3                | 416                | 37.3              | 8.23 wt%           |

#### Notes and references

1. X. Liu, K. Wang, Y. Zhou, et al., *In-situ* fabrication of Ce-rich CeO<sub>2</sub> nanocatalyst for efficient CO oxidation, *J. Alloys Compd.*, 2019, **792**, 644-651.
2. D. Jampaiah, V. K. Velisoju, D. Devaiah, et al., Flower-like Mn<sub>3</sub>O<sub>4</sub>/CeO<sub>2</sub> microspheres as an efficient catalyst for diesel soot and CO oxidation: Synergistic effects for enhanced catalytic performance, *Appl. Surf. Sci.*, 2019, **473**, 209-221.
3. X. Zhang, F. Hou, Y. Yang, et al., A facile synthesis for cauliflower like CeO<sub>2</sub> catalysts from Ce-BTC precursor and their catalytic performance for CO oxidation, *Appl. Surf. Sci.*, 2017, **423**, 771-779.
4. Y. Deng, P. Tian, S. Liu, et al., Enhanced catalytic performance of atomically dispersed Pd on Pr-doped CeO<sub>2</sub> nanorod in CO oxidation, *J. Hazard. Mater.*, 2022, **426**, 127793.
